# Supplementary material
Source: publisher figshare collection journal article supplement (https://sage.figshare.com/ndownloader/files/14284382)
Supplement: Supplementary file 1 [file 14284382]

## Appendix C: Mini root cause analysis tool

\*\*For Practice Use Only. Select Information **(4 non-PHI questions)** to be entered in SurveyMonkey\*\*

Suggestions on the use of this form:

- Set aside a 30 minute period to perform this mini-root cause analysis two times per month with members of your core improvement team.
- Designate a team member to identify a diagnostic error that occurred recently (within the last 7 days) **Note: The identified diagnostic error should be one that holds meaning for your practice and for which room for improvement can be identified.**
- A team member/leader should draft an initial description of how the error occurred (Q4 below) in advance of the team meeting.
- Encourage a care team member (provider, nurse, etc) who was involved in the diagnostic error to participate in this mini-RCA meeting (this way, the factors will be best reflected below).

Patient Name: \_\_\_\_\_ Medical Record Number: \_\_\_\_\_

|    | Question                                                                                                                                                                                                                                                                                                                                                                                                                                                                                                                 | Practice Response                                                                                                                                                                |
|----|--------------------------------------------------------------------------------------------------------------------------------------------------------------------------------------------------------------------------------------------------------------------------------------------------------------------------------------------------------------------------------------------------------------------------------------------------------------------------------------------------------------------------|----------------------------------------------------------------------------------------------------------------------------------------------------------------------------------|
| 1. | Type of Diagnostic Error:<br><b>SurveyMonkey Question1.</b>                                                                                                                                                                                                                                                                                                                                                                                                                                                              | <input type="checkbox"/> Missed Adolescent Depression<br><input type="checkbox"/> Missed Elevated Blood Pressure<br><input type="checkbox"/> Delayed Actionable Laboratory Value |
| 2. | Date of Error (MM//YY):                                                                                                                                                                                                                                                                                                                                                                                                                                                                                                  | __ / __ / __ Approximate time of day (24 hour clock): 00:00                                                                                                                      |
| 3. | Date Mini-RCA Completed (MM/DD/YY):                                                                                                                                                                                                                                                                                                                                                                                                                                                                                      | __ / __ / __                                                                                                                                                                     |
| 4. | Please describe the error and how it occurred (this meeting should be discussed briefly but the facts should not be the focus of the project) :                                                                                                                                                                                                                                                                                                                                                                          |                                                                                                                                                                                  |
| 5. | Where in the Process did the error occur? (Check all that apply within <u>1 Diagnostic</u> Error Type)<br><b>SurveyMonkey Question2. [logic included for above mentioned Q1]</b>                                                                                                                                                                                                                                                                                                                                         |                                                                                                                                                                                  |
|    | <u>A. Missed Adolescent Depression:</u><br><input type="checkbox"/> Patient Screened <input type="checkbox"/> Recognize Abnormal Screen <input type="checkbox"/> Notify Family of Abnormal Screen <input type="checkbox"/> Refer Patient to Mental Health Resources <input type="checkbox"/> Patient attends Mental Health <input type="checkbox"/> Mental Health Provider Feeds Back Information to Practice <input type="checkbox"/> Document Mental Health Diagnosis <input type="checkbox"/> Other (Describe: _____) |                                                                                                                                                                                  |
|    | <u>B. Missed Elevated Blood Pressure:</u><br><input type="checkbox"/> Measure BP <input type="checkbox"/> Record BP <input type="checkbox"/> Recognize Abnormal BP <input type="checkbox"/> Notify Family of Abnormal BP <input type="checkbox"/> Act on Abnormal BP <input type="checkbox"/> Document Action on BP <input type="checkbox"/> Other (Describe: _____)                                                                                                                                                     |                                                                                                                                                                                  |
|    | <u>C. Delayed Actionable Laboratory Value:</u> Which Lab Test? _____<br><input type="checkbox"/> Test Results Returned to Clinic <input type="checkbox"/> Provider Views Test Results <input type="checkbox"/> Recognize Abnormal Results <input type="checkbox"/> Notify Family of Abnormal Results <input type="checkbox"/> Act on Abnormal Results <input type="checkbox"/> Document Action on Abnormal Results<br><input type="checkbox"/> Other (Describe: _____)                                                   |                                                                                                                                                                                  |

|                                                                                                                                                                                                                                                                                                                                                                                                                                                                                                                                                                                                                                                                                                                                                                                                                                                                                                                                                                                                                                                                                                                                                                                                                                                                                                                                                                                                                                                            |                                                                                                                                                                                                                                                                                                                                                                                                                                |  |
|------------------------------------------------------------------------------------------------------------------------------------------------------------------------------------------------------------------------------------------------------------------------------------------------------------------------------------------------------------------------------------------------------------------------------------------------------------------------------------------------------------------------------------------------------------------------------------------------------------------------------------------------------------------------------------------------------------------------------------------------------------------------------------------------------------------------------------------------------------------------------------------------------------------------------------------------------------------------------------------------------------------------------------------------------------------------------------------------------------------------------------------------------------------------------------------------------------------------------------------------------------------------------------------------------------------------------------------------------------------------------------------------------------------------------------------------------------|--------------------------------------------------------------------------------------------------------------------------------------------------------------------------------------------------------------------------------------------------------------------------------------------------------------------------------------------------------------------------------------------------------------------------------|--|
| 6.                                                                                                                                                                                                                                                                                                                                                                                                                                                                                                                                                                                                                                                                                                                                                                                                                                                                                                                                                                                                                                                                                                                                                                                                                                                                                                                                                                                                                                                         | <p>At first review, <b>why</b> does the core improvement team believe this failure to identify and act on a diagnostic error occurred?</p>                                                                                                                                                                                                                                                                                     |  |
| <p><b>The next step is to perform a <i>Round Robin</i> to have each core improvement team member share their perspective on the top factor/s within the (1) patient/family, (2) provider/nurse/administrative, and (3) system/practice areas that contributed to this error.</b></p> <p><b>Patient/Family Factors:</b></p> <p>What Patient/Family factors contributed to the error? (for example: age, gender, reason for visit, patient comorbidities, language barriers, acute illness, agitation of patient/family, social issues, etc.)</p> <p><b>Provider/Nurse/Administrative Factors:</b></p> <p>What Provider/Nurse/Administrative factors contributed to the error? (for example: type of provider, provider level of training, provider fatigue/impairment, personal stressors of providers, provider disagreements, provider knowledge, provider beliefs about the project or the patient, etc.)</p> <p><b>Systems/Practice Factors:</b></p> <p>What System/Practice factors contributed to the error? (for example: <i>provider volume that day, nurse staffing that day, office assistant staffing that day</i>, time of visit, clinic milieu during visit (chaotic vs. calm), day of the week, increased workload, verbal communication, written communication, computer software or hardware, non-computer equipment, etc.)</p> <p style="text-align: right;"><b>Use the space below to write down the factors noted in each realm.</b></p> |                                                                                                                                                                                                                                                                                                                                                                                                                                |  |
| 7.                                                                                                                                                                                                                                                                                                                                                                                                                                                                                                                                                                                                                                                                                                                                                                                                                                                                                                                                                                                                                                                                                                                                                                                                                                                                                                                                                                                                                                                         | <p>Record <u>Patient/Family</u> factors that contributed to the error <b>to the right</b> →<br/>(for example: age, gender, reason for visit, patient comorbidities, language barriers, acute illness, agitation of patient/family, social issues, etc.)</p>                                                                                                                                                                    |  |
|                                                                                                                                                                                                                                                                                                                                                                                                                                                                                                                                                                                                                                                                                                                                                                                                                                                                                                                                                                                                                                                                                                                                                                                                                                                                                                                                                                                                                                                            |                                                                                                                                                                                                                                                                                                                                                                                                                                |  |
| 8.                                                                                                                                                                                                                                                                                                                                                                                                                                                                                                                                                                                                                                                                                                                                                                                                                                                                                                                                                                                                                                                                                                                                                                                                                                                                                                                                                                                                                                                         | <p>Record <u>Provider/Nurse/Administrative</u> factors that contributed to the error <b>to the right</b> →<br/>(for example: type of provider, provider level of training, provider fatigue/impairment, personal stressors of providers, provider disagreements, provider knowledge, provider beliefs about the project or the patient, etc.)</p>                                                                              |  |
|                                                                                                                                                                                                                                                                                                                                                                                                                                                                                                                                                                                                                                                                                                                                                                                                                                                                                                                                                                                                                                                                                                                                                                                                                                                                                                                                                                                                                                                            |                                                                                                                                                                                                                                                                                                                                                                                                                                |  |
| 9.                                                                                                                                                                                                                                                                                                                                                                                                                                                                                                                                                                                                                                                                                                                                                                                                                                                                                                                                                                                                                                                                                                                                                                                                                                                                                                                                                                                                                                                         | <p>Record <u>System/Practice</u> factors <b>that contributed to the error to the right</b> →<br/>(for example: <i>provider volume that day, nurse staffing that day, office assistant staffing that day, time of visit, clinic milieu during visit (chaotic vs. calm)</i>, increased workload, staffing concerns, verbal communication, written communication, computer software or hardware, non-computer equipment, etc)</p> |  |

| Lessons Learned: |                                                                                                                                                                                                           |                                                                                                                                                                                                                                                                                                                                                                                                                                                                                                                                                                                                                                                                                                                                                                                                                                                                                                                                                                                                                                                                                                                                                                                                                                                                                                                                                                                                                                                                                                                                                                                                                                        |
|------------------|-----------------------------------------------------------------------------------------------------------------------------------------------------------------------------------------------------------|----------------------------------------------------------------------------------------------------------------------------------------------------------------------------------------------------------------------------------------------------------------------------------------------------------------------------------------------------------------------------------------------------------------------------------------------------------------------------------------------------------------------------------------------------------------------------------------------------------------------------------------------------------------------------------------------------------------------------------------------------------------------------------------------------------------------------------------------------------------------------------------------------------------------------------------------------------------------------------------------------------------------------------------------------------------------------------------------------------------------------------------------------------------------------------------------------------------------------------------------------------------------------------------------------------------------------------------------------------------------------------------------------------------------------------------------------------------------------------------------------------------------------------------------------------------------------------------------------------------------------------------|
| 1.               | <p>Rank the top three factor(s) that contributed the MOST to this Diagnostic Error? (all 3 can be from the same group or different groups)</p> <p><b>SurveyMonkey Question3.</b></p>                      | <p><b>Patient factors of:</b> <input type="checkbox"/> gender <input type="checkbox"/> age <input type="checkbox"/> comorbidities, <input type="checkbox"/> insurance status <input type="checkbox"/> reason for visit, <input type="checkbox"/> language barriers, <input type="checkbox"/> acute illness, <input type="checkbox"/> agitation of patient/family, <input type="checkbox"/> social issues, <input type="checkbox"/> other concerning patient factors, defined as: _____,</p> <p><b>Provider/Nurse/Admin. factors of:</b> <input type="checkbox"/> type of provider, <input type="checkbox"/> provider level of training <input type="checkbox"/> provider fatigue/impairment <input type="checkbox"/> personal stressors of providers <input type="checkbox"/> provider disagreements <input type="checkbox"/> provider knowledge <input type="checkbox"/> provider beliefs about the project or the patient, <input type="checkbox"/> other provider/nurse/administrative factors defined as: _____</p> <p><b>Systems factors of:</b> <input type="checkbox"/> patient volume that day <input type="checkbox"/> nurse staffing that day <input type="checkbox"/> office assistant staffing that day <input type="checkbox"/> time of day of visit, <input type="checkbox"/> clinic milieu, <input type="checkbox"/> verbal communication, <input type="checkbox"/> written communication, <input type="checkbox"/> computer software, <input type="checkbox"/> computer hardware, <input type="checkbox"/> non-computer equipment, <input type="checkbox"/> other concerning systematic factors, defined as: _____</p> |
| 2.               | <p>What Interventions can we put into place to reduce the risk of this Diagnostic Error occurring again?* (<i>Consult strength of intervention grid below</i>).</p> <p><b>SurveyMonkey Question4.</b></p> |                                                                                                                                                                                                                                                                                                                                                                                                                                                                                                                                                                                                                                                                                                                                                                                                                                                                                                                                                                                                                                                                                                                                                                                                                                                                                                                                                                                                                                                                                                                                                                                                                                        |
| 3.               | Who will lead this intervention?                                                                                                                                                                          |                                                                                                                                                                                                                                                                                                                                                                                                                                                                                                                                                                                                                                                                                                                                                                                                                                                                                                                                                                                                                                                                                                                                                                                                                                                                                                                                                                                                                                                                                                                                                                                                                                        |
| 4.               | Date we will start piloting the intervention. (MM/DD/YY):                                                                                                                                                 | __ / __ / __                                                                                                                                                                                                                                                                                                                                                                                                                                                                                                                                                                                                                                                                                                                                                                                                                                                                                                                                                                                                                                                                                                                                                                                                                                                                                                                                                                                                                                                                                                                                                                                                                           |
| 5.               | How did you communicate with peers at the clinic about these lessons learned?                                                                                                                             |                                                                                                                                                                                                                                                                                                                                                                                                                                                                                                                                                                                                                                                                                                                                                                                                                                                                                                                                                                                                                                                                                                                                                                                                                                                                                                                                                                                                                                                                                                                                                                                                                                        |

#### \*Strength of Interventions

| Weaker Actions                      | Intermediate Actions                         | Stronger Actions                                                           |
|-------------------------------------|----------------------------------------------|----------------------------------------------------------------------------|
| Double Check                        | Checklists/ Cognitive Aid                    | Architectural/physical plant changes                                       |
| Warnings and labels                 | Increased Staffing/Reduce workload           | Tangible involvement and action by leadership in support of patient safety |
| New procedure, memorandum or policy | Redundancy                                   | Simplify the process / remove unnecessary steps                            |
| Training and/or education           | Enhance Communication (read-back, SBAR etc.) | Standardize equipment and/ or process of care map                          |
| Additional Study/analysis           | Software enhancement/modifications           | New device usability testing before purchasing                             |
|                                     | Eliminate look alike and sound- a-likes      | Engineering Control of interlock (forcing functions)                       |
|                                     | Eliminate/reduce distractions                |                                                                            |

- Adapted from John Gosbee, MD, MS Human Factors Engineering
- Remember, sometimes a weaker action is your only option.
